# Supplementary material
Source: Royal Society of Chemistry journal article supplement (https://www.rsc.org/suppdata/cc/1999/1851/905743i.doc)
Supplement: Supplementary file 1 [file 905743i.doc]

**Supplementary Data**

**A colourimetric calix[4]pyrrole–4-nitrophenolate based anion sensor**

Philip A. Gale,**ab* Lance J. Twyman,**c* Cristin I. Handlin*c* and Jonathan L. Sessler*d*

*a Department of Chemistry, University of Southampton, Southampton, UK SO17 1BJ*

*b Department of Chemistry, University of Oxford, Inorganic Chemistry Laboratory, South Parks Road, Oxford, UK OX1 3QR*

*c The Polymer Centre, School of Physics and Chemistry, University of Lancaster, Lancaster, UK LA1 4YA*

*dDepartment of Chemistry and Biochemistry, The University of Texas at Austin, Austin, Texas 78712-1167, USA*


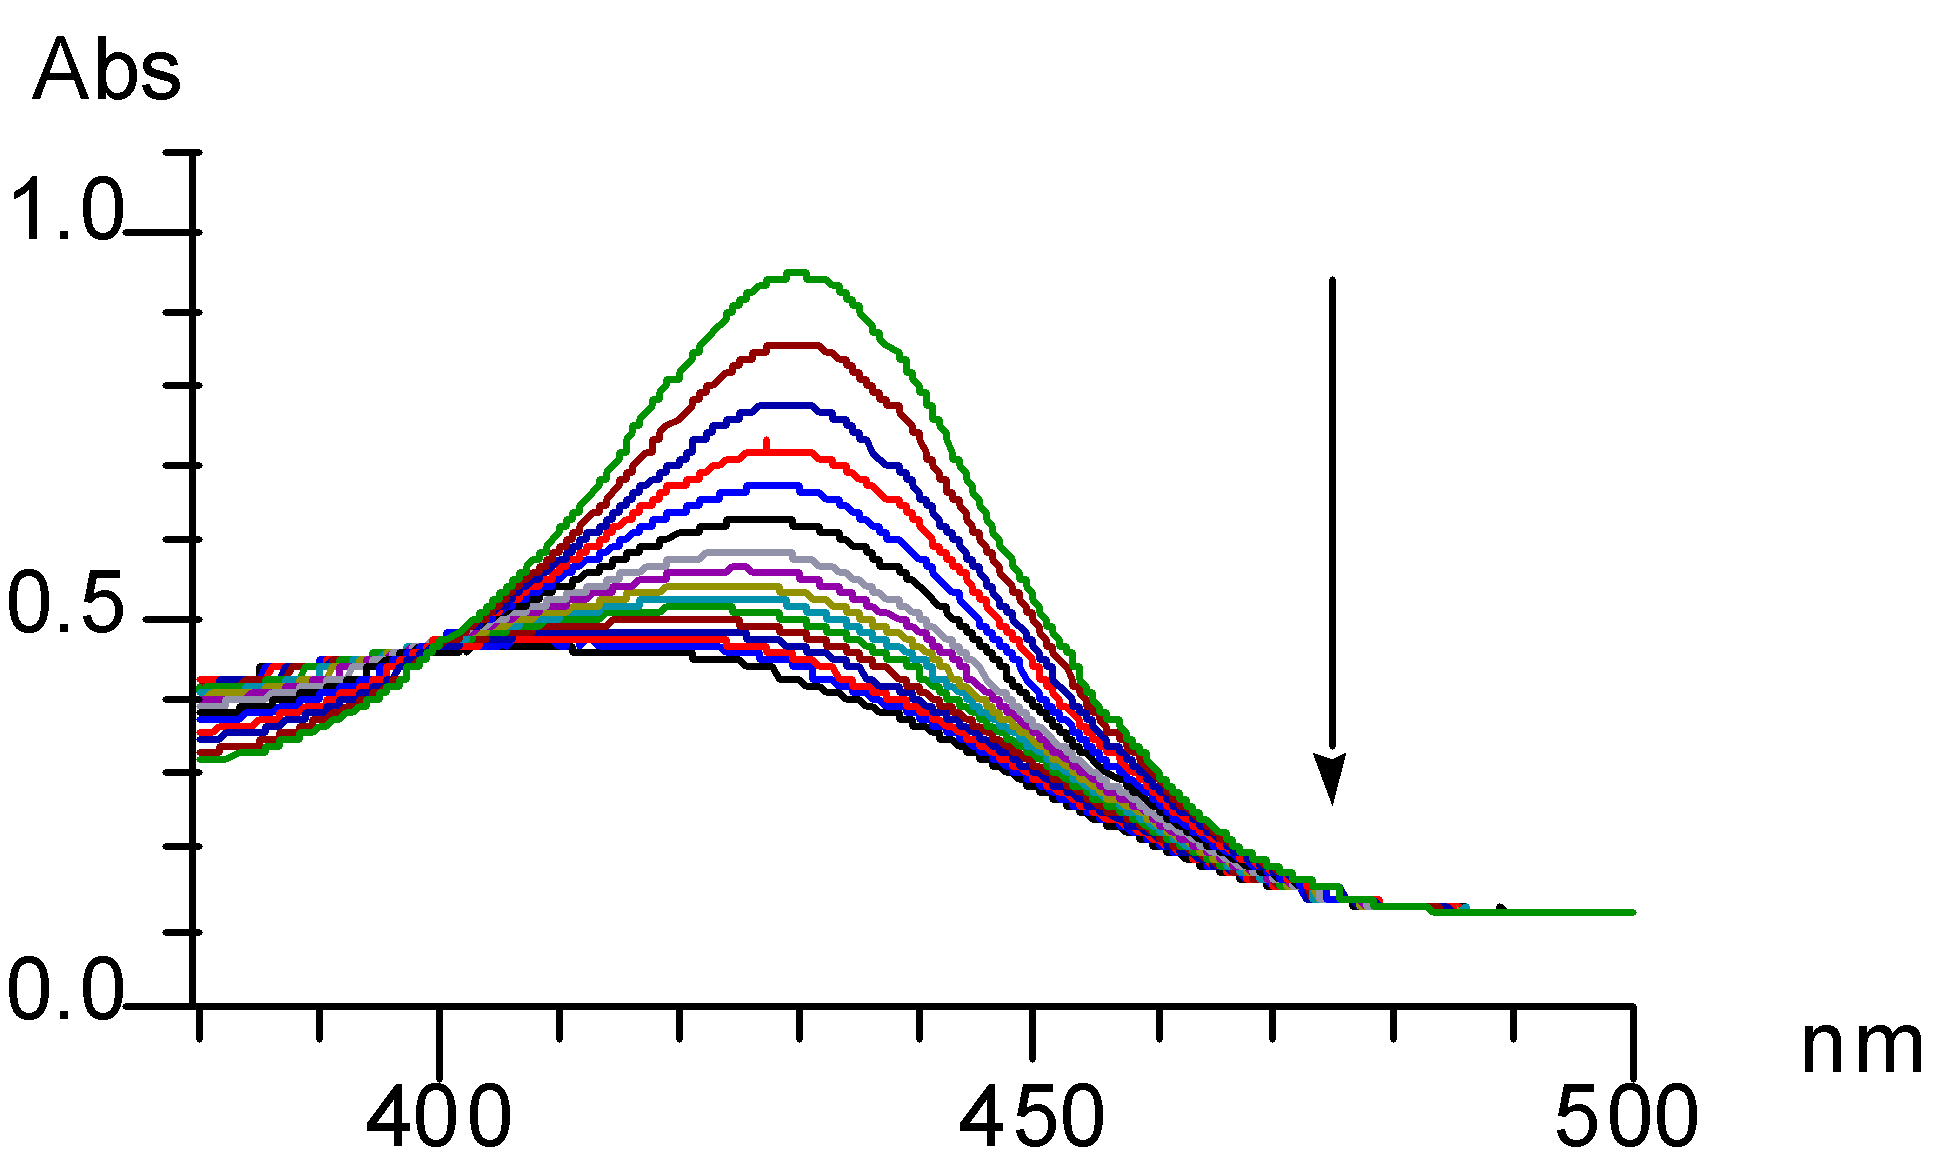


**Supplementary Figure 1** Decreasing absorbance of the 4-nitrophenolate anion **2** (3.6 × 10-5 mol dm-3) upon addition of calixpyrrole **1** (5 × 10-2 mol dm-3) in dichloromethane at 25 ˚C.


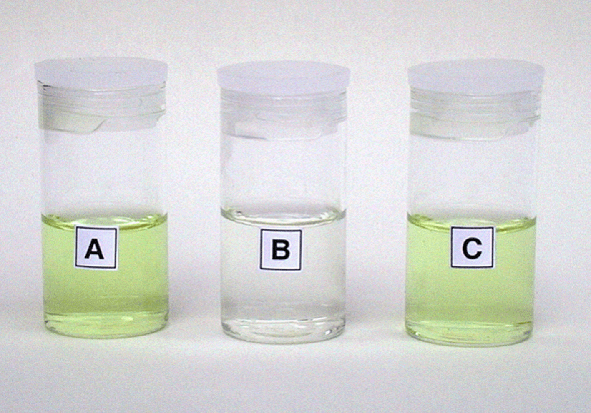


**Supplementary Figure 2** Solutions (CH3CN–CH2Cl2 24:1 *v/v*) of (**A**) tetrabutylammonium 4-nitrophenolate **2** (1.3 × 10-5 mol dm-3), (**B**) *meso*-octamethylcalix[4]pyrrole **1** (2.3 × 10-4 mol dm-3) and tetrabutylammonium 4-nitrophenolate **2** (1.3 × 10-5 mol dm-3), and (**C**) *meso*-octamethylcalix[4]pyrrole **1** (2.3 × 10-4 mol dm-3), tetrabutylammonium 4-nitrophenolate **2** (1.3 × 10-5 mol dm-3) and tetrabutylammonium fluoride (7.7 × 10-4 mol dm-3).


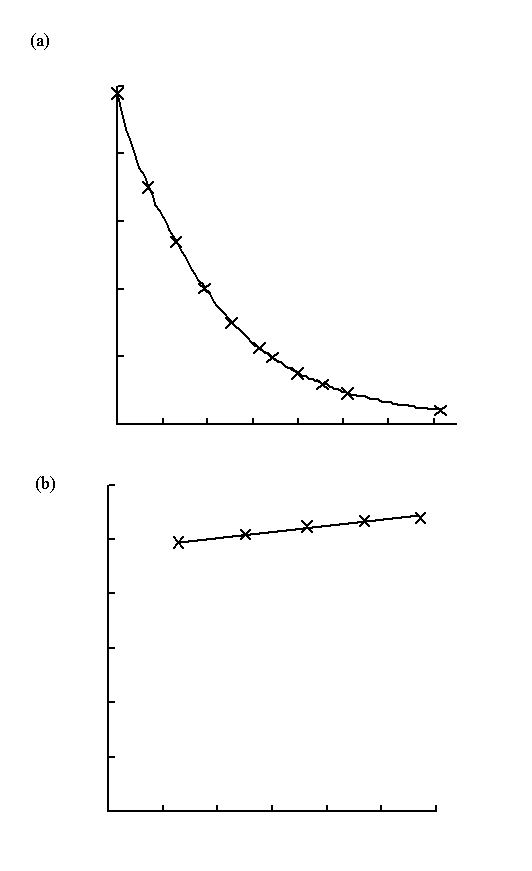


**Supplementary Figure 3**  UV/vis titration curves (a) 4-nitrophenolate + calixpyrrole

And (b) 4-nitrophenolate + pyrrole in dichloromethane (4-nitrophenolate concentration = 3.6 × 10-5 M)

**Supplementary Figure 4** Experimental (crosses) and calculated (curve) NMR titration data for *meso*-octamethylcalix[4]pyrrole and tetrabutylammonium nitrophenolate in dichloromethane-*d*2 at 25 °C.
